# Supplementary material for: Real-Time Tracheal Ultrasound vs. Capnography for Intubation Confirmation during CPR Wearing a Powered Air-Purifying Respirator in COVID-19 Era
Source: MDPI journal article supplement (doi:10.3390/diagnostics14020225), 2024-01-21
Supplement: s1 [file s1]

## SUPPLEMENTARY DATA

**Supplementary Table S1.** Relation between TTUS proficiency and image acquisition time

| Experience in TTUS | Time spent on TTUS (s) (Median [IQR]) | Kruskal–Wallis test      | Jonckheere–Terpstra trend test |
|--------------------|---------------------------------------|--------------------------|--------------------------------|
| 0–1 (n = 1)        | 2 [2–2]                               | <i>P</i> -value = 0.3072 | <i>P</i> -value = 0.1446       |
| 2–5 (n = 5)        | 10 [8–6]                              |                          |                                |
| 6–10 (n = 5)       | 10 [10–20]                            |                          |                                |
| > 10 (n = 22)      | 15 [9–25]                             |                          |                                |

The number of TTUS experiences and time required for TTUS tube placement confirmation using the Kruskal–Wallis test not shows a significant correlation. The Jonckheere–Terpstra trend test demonstrates no trend between TTUS proficiency and time spent on TTUS.

TTUS, trans-tracheal ultrasound; IQR, interquartile range

### Supplementary Video S1 Endotracheal intubation at TTUS scan

TTUS, trans-tracheal ultrasound

### Supplementary Video S2 Esophageal intubation at TTUS scan

TTUS, trans-tracheal ultrasound

### Supplementary Video S3 Lung sliding assessment
