# Supplementary material for: Real-Time Tracheal Ultrasound vs. Capnography for Intubation Confirmation during CPR Wearing a Powered Air-Purifying Respirator in COVID-19 Era
Source: Diagnostics (Basel). 2024 Jan 21;14(2):225. doi: 10.3390/diagnostics14020225 (PMC10813934; doi:10.3390/diagnostics14020225)
Supplement: Supplementary file 1 [file diagnostics-14-00225-s001.zip]

Archive with 4 entries (4 files):
- SUPPLEMENTAL DATA 230116.pdf
- Video S1. Endotracheal intubation at TTUS scan.AVI
- Video S2. Esophageal intubation at TTUS scan.AVI
- Video S3. Lung sliding assessment.AVI
